# Supplementary material
Source: publisher site journal article supplement (https://www.dovepress.com/article/470483)
Supplement: Supplementary file 1 [file get_supplementary_file.php]

**Supplementary Methods**

**Metagenomic Next-Generation Sequencing Protocol**

Cell-free DNA extraction and library preparation were conducted using an NGS Automatic Library Preparation System (Cat.MAR002, Hangzhou Matridx Biotechnology Co., Ltd, Hangzhou, China). The reagents included a Nucleic Acid Extraction Kit (Cat.MD049, Hangzhou Matridx Biotechnology Co., Ltd, Hangzhou, China) and a Metagenomic DNA Library Preparation Kit (Cat. MD001T, Hangzhou Matridx Biotechnology Co., Ltd, Hangzhou, China). High-throughput sequencing was performed using the NextSeq CN500 platform. Bioinformatic analysis was conducted by Metagenomic analysis software Gentellix (MS001, Hangzhou Matridx Biotechnology Co., Ltd, Hangzhou, China). Sequences of human origin were filtered and the remaining reads were aligned to a reference database (NCBI GenBank and in-house curated microbial genomic data) to identify species, sequence number and relative abundance.
